# Supplementary material
Source: HighWire-hosted journal article supplement (http://www.jrheum.org/highwire/filestream/31075/field_highwire_adjunct_files/0/160763_Data_Suppl.pdf)
Supplement: 160763_Data_Suppl.pdf [file 160763_Data_Suppl.pdf]

**Supplementary Table 1.** The characteristics of the DM and PM patients who did not undergo a biopsy of the fasciae.

| Variables       | DM<br>(n=11) | PM<br>(n=11) | Total<br>(n=22) |
|-----------------|--------------|--------------|-----------------|
| Age, years      | 49.90±10.10  | 57.64±15.22  | 54.27±13.27     |
| Sex, M/F        | 4/7          | 2/9          | 6/16            |
| Myalgia         | 8 (72.72)    | 4 (36.36)    | 12 (54.54)      |
| MMT8            | 76.55±3.616  | 77.27±3.259  | 76.87±3.379     |
| CK (IU/l)       | 1390±2392    | 1689±1364    | 1540±1894       |
| Aldolase (IU/l) | 18.58±23.26  | 24.91±16.91  | 21.75±20.11     |
| Anti-Jo1Ab      | 0 (0)        | 2 (18.18)    | 2 (9.090)       |
| ILD             | 6 (54.55)    | 7 (63.64)    | 13 (59.01)      |
| Malignancy      | 3 (27.27)    | 1 (9.090)    | 4 (18.18)       |

The values indicate the number of patients (%) or the mean ± SD.

<sup>a</sup> Normal range, 25-200 IU/l; <sup>b</sup> normal range, 2.1-6.1 U/l

DM, dermatomyositis; PM, polymyositis; CK, creatine kinase; MMT, manual muscle testing; Anti-Jo1 Ab, Anti-Jo1 antibody; ILD, interstitial lung disease.

**Supplementary Table 2.** MRI findings of fasciae and muscles in patients with DM and PM

|                      | DM         |              |            | PM       |               |            | Total      |
|----------------------|------------|--------------|------------|----------|---------------|------------|------------|
|                      | Bx group   | Non-Bx group | Total      | Bx group | Non- Bx group | Total      |            |
| Fascial involvement  | 20 (83.33) | 9 (81.82)    | 29 (82.86) | 4 (50)   | 3 (27.27)     | 7 (36.84)  | 36 (66.67) |
| Muscular involvement | 23 (95.83) | 10 (90.91)   | 33 (94.29) | 6 (75)   | 10 (90.91)    | 16 (84.21) | 49 (85.96) |
| Total                | 24         | 11           | 35         | 8        | 11            | 19         | 54         |

The values are presented as the number of patients (%).

MR, magnetic resonance imaging; DM, dermatomyositis; PM, polymyositis; Bx, biopsy.

Bx group: the group who underwent a biopsy of the fasciae and muscles.

Non-Bx group: the group who did not undergo a biopsy of the fasciae.
